# Supplementary material
Source: PubMed Central journal article supplement (PMC4478078)

# The C-terminal heme regulatory motifs of heme oxygenase-2 are redox-regulated heme binding sites

*Angela S. Fleischhacker<sup>#</sup>, Ajay Sharma<sup>^</sup>, Michelle Choi<sup>#</sup>, Andrea M. Spencer<sup>,\$#</sup>, Ireena Bagai<sup>#</sup>, Brian Hoffman<sup>^</sup>, and Stephen W. Ragsdale<sup>#\*</sup>*

<sup>#</sup> Department of Biological Chemistry and the <sup>\$</sup> Cellular and Molecular Biology Training Program, University of Michigan, Ann Arbor, MI 48109

<sup>^</sup> Department of Chemistry, Northwestern University, Evanston, IL 60208

**SUPPORTING INFORMATION**

**Supporting Figure 1.**  $^{14}\text{N}$ ,  $^{15}\text{N}$ - DAVIES ENDOR spectra of unlabeled and  $^{15}\text{N}$ -labeled  $\text{Fe}^{3+}$ -HO2 measured at the indicated  $g$ -values. Experimental conditions: see Fig 2.

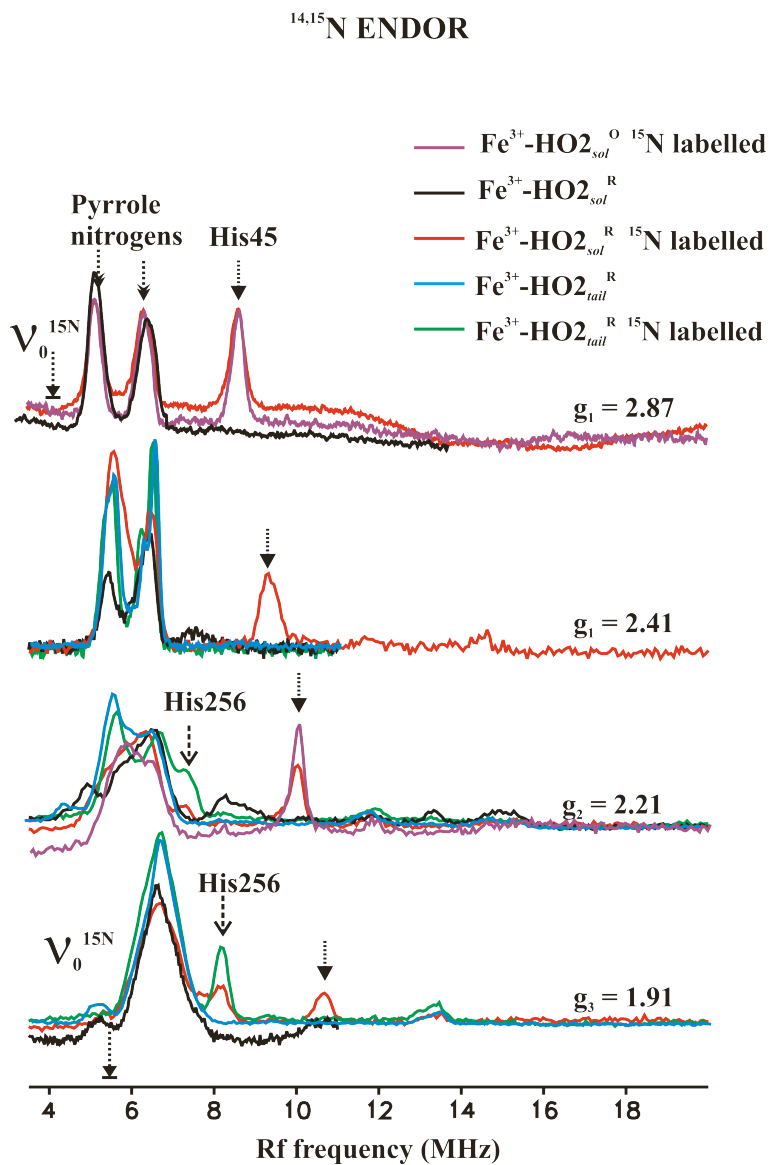

Supplement: NIHMS701434-supplement-Supplemental.pdf [file NIHMS701434-supplement-Supplemental.pdf]
